# Supplementary material
Source: PubMed Central journal article supplement (PMC2785591)
Supplement: supp_M109.045344_jbc.M109.045344-1.pdf [file supp_M109.045344_jbc.M109.045344-1.pdf]

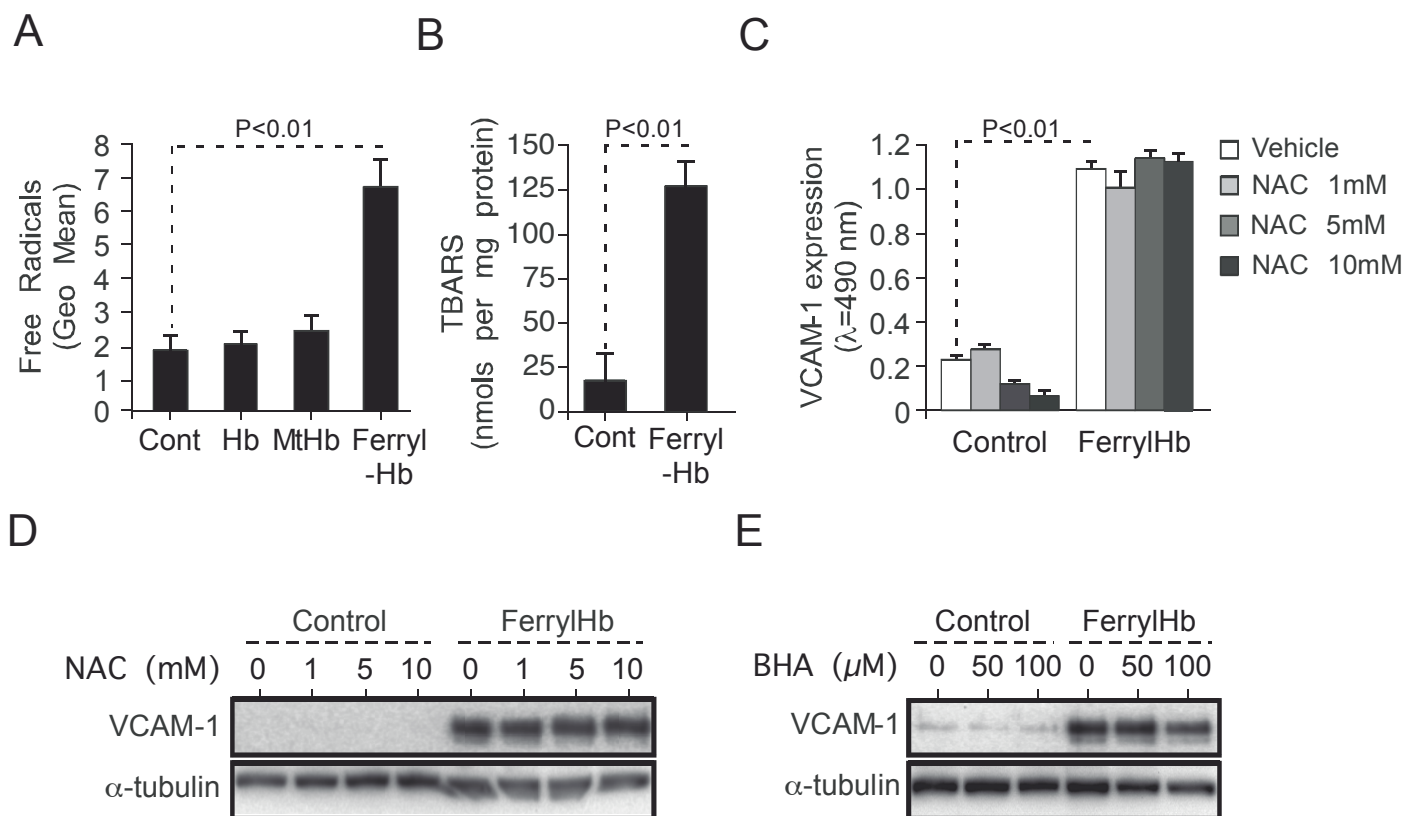

G.Silva et al. Supplementary Figure 2

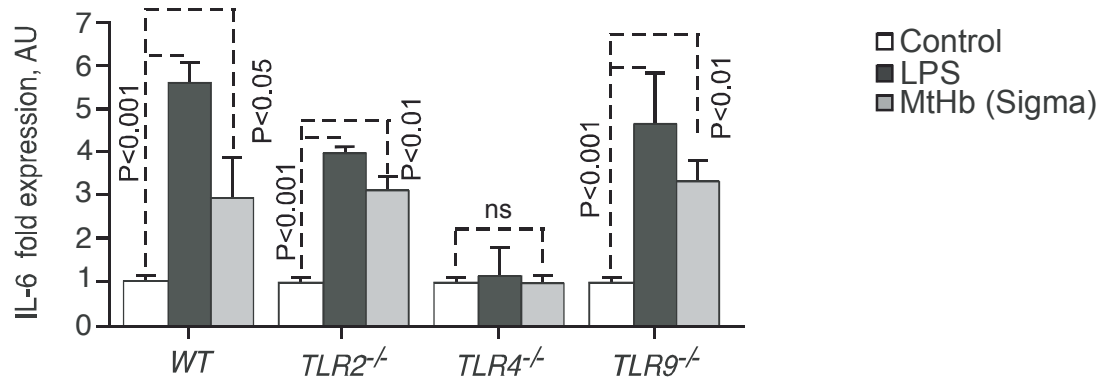





## SUPPLEMENTARY FIGURE LEGENDS

**Supplementary Fig. 1:** The pro-inflammatory effect of FerrylHb acts via a mechanism distinct from its pro-oxidant effect. A) Confluent HUVEC were either not treated or exposed (4h) to Hb, MtHb, or FerrylHb (20  $\mu$ M). B) Confluent HUVEC were either not treated or exposed to FerrylHb (20  $\mu$ M; 8h). C) Confluent HUVEC were exposed to N-acetyl-L-cysteine (NAC; 4h) (Sigma-Aldrich) or vehicle and not further treated (Control) or exposed (8h) to FerrylHb (20  $\mu$ M). Expression of VCAM-1 was detected by cellular ELISA. Results in (A-C) are the mean values  $\pm$  standard deviation (n=3), from one out of three independent experiments. P values were calculated with ANOVA and the Tukey-Kramer multiple comparison test. D) HUVEC were treated as in (C) and proteins were detected in whole cell lysates by Western blotting. E) HUVEC were exposed to butylated hydroxyanisole (BHA; 4h; Sigma-Aldrich) or vehicle (0) and not further treated (Control) or exposed (8h) to FerrylHb (20  $\mu$ M) and proteins were detected in whole cell lysates by Western blotting. Immunoblots in (D) and (E) are representative of at least two independent experiments.

**Supplementary Fig. 2:** The pro-inflammatory effect of Sigma MtHb is abrogated in *TLR4* deficient cells. Primary kidney fibroblasts isolated from *C57BL/6*, *Tlr2<sup>-/-</sup>*, *Tlr4<sup>-/-</sup>* and *Tlr9<sup>-/-</sup>* mice were either untreated (control), exposed (24h) to MtHb (2.6  $\mu$ M, Sigma-Aldrich) or to LPS (100 ng/ml). IL-6 concentrations were measured in the cell culture supernatants by ELISA. Results are shown as mean  $\pm$  standard deviations (n=3), from one representative experiment out of three. P values were calculated using ANOVA and the Tukey-Kramer multiple comparison test.

**Supplementary Fig. 3.** FerrylHb induces low level of Tyr 42 I $\kappa$ B $\alpha$  phosphorylation in EC. Confluent HUVEC were either not-treated (NT), exposed to FerrylHb (20  $\mu$ M) or to pervanadate (PV; 1mM; 30 min), used as a positive control to induce I $\kappa$ B $\alpha$  phosphorylation at Tyr-42. Total I $\kappa$ B $\alpha$  P-Tyr-42 I $\kappa$ B $\alpha$  and  $\alpha$ -tubulin proteins were detected by western blotting.

**Supplementary Fig. 4:** Effect of actin polymerization on MAPK activation by FerrylHb. A) and B) Confluent HUVEC were exposed to latrunculin B (lat.B; 0.5  $\mu$ M; 30 min), cytochalasin D (cyto.D; 0.5  $\mu$ M; 30 min) or vehicle and either not further treated (control) or exposed (8h) to FerrylHb (20  $\mu$ M). Proteins were detected in whole cell lysates by Western blotting. Immunoblots are representative of two independent experiments.
